# Supplementary material for: Low molecular weight silicones induce cell death in cultured cells
Source: PubMed Central journal article supplement (PMC7293294; doi:10.1038/s41598-020-66666-7), 2020-06-12

## Supplementary Information

### Low molecular weight silicones induce cell death in cultured cells

Carla Onnekink<sup>1</sup>, Rita M. Kappel<sup>2</sup>, Wilbert C. Boelens<sup>1</sup>, Ger J.M. Pruijn<sup>1\*</sup>

<sup>1</sup>Department of Biomolecular Chemistry, Institute for Molecules and Materials (IMM), Radboud University, Nijmegen; <sup>2</sup>Dr. Kappel Institute, Zwolle, The Netherlands

### Supplementary Figure 1

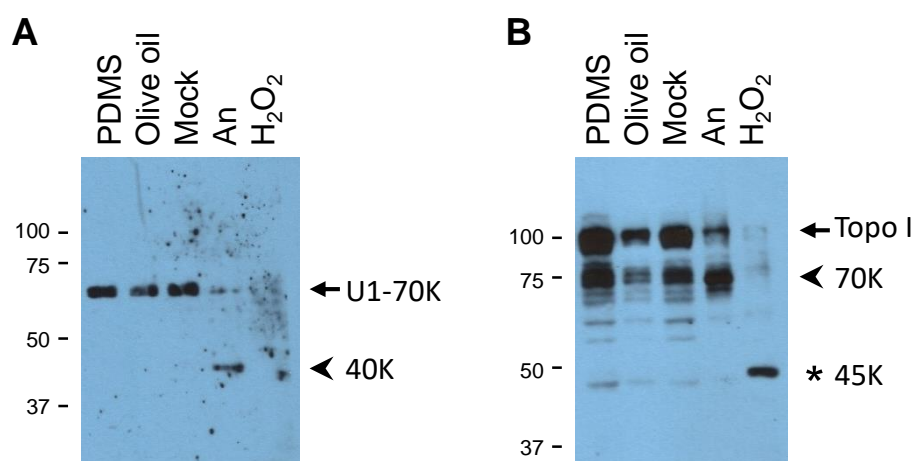

**Suppl. Fig. 1** Polydimethylsiloxane does not induce cell death. Jurkat cells were cultured for 7 hours in the presence of polydimethylsiloxane (PDMS) or olive oil. Cell lysates were analyzed by western blotting using patient sera reactive with U1-70K (A) or Topo I (B). The apoptotic cleavage products of U1-70K and Topo I (arrows) are indicated with arrowheads; the necrotic cleavage product of Topo I is indicated with an asterisk. As a reference, material from anisomycin- (An), H<sub>2</sub>O<sub>2</sub>- and mock-treated cells was electrophoresed in parallel. The positions of molecular weight markers are indicated on the left of each panel. Note that in both panels a cropped part of the respective blot is shown, as further illustrated below.

# Full-length gels and blots

**Figure 2**

Panel A

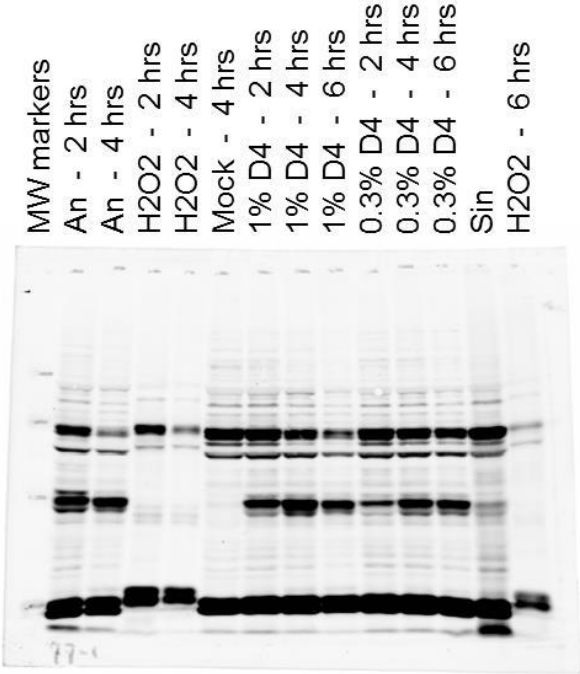

Lane numbers in Figure 2A    1   2   3   4   6   7   8   9   -   -   -   -   5

Panel B

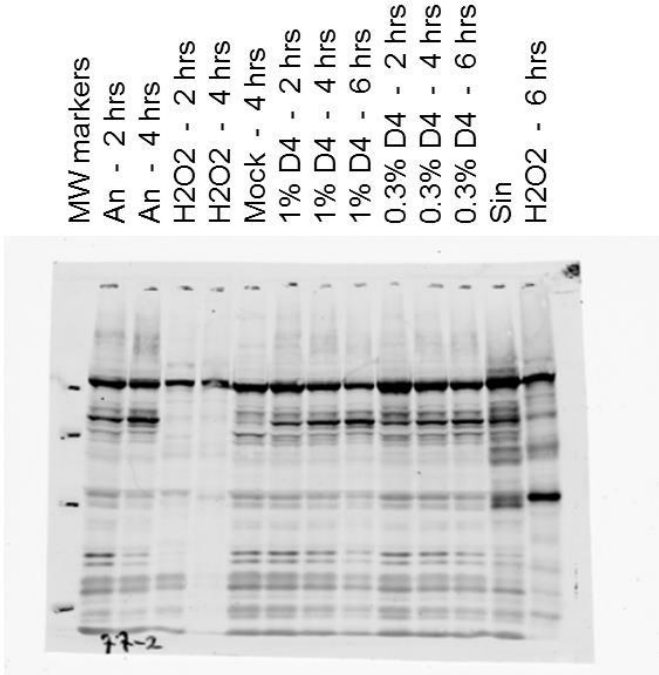

Lane numbers in Figure 2B    1   2   3   4   6   7   8   9   -   -   -   -   5

Figure 4

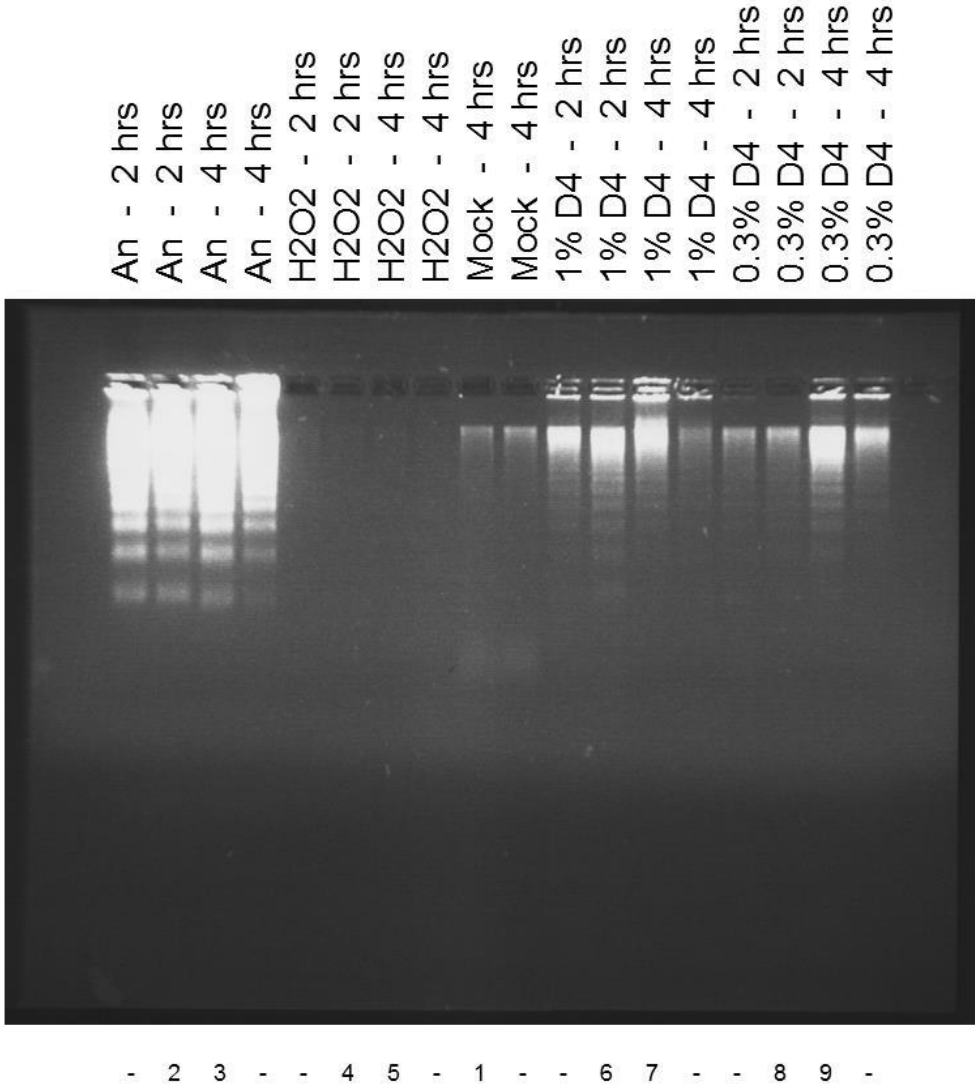

**Figure 5**

Section used in Figure 5A  
marked in red

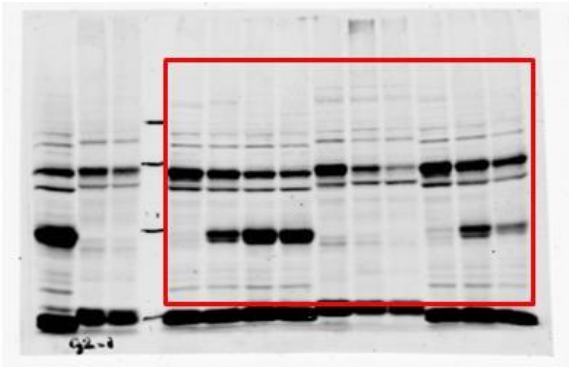

Panel A

Section used in Figure 5B  
marked in red

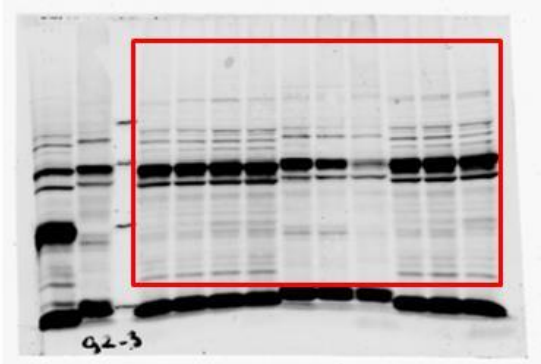

Panel B

Section used in Figure 5C  
marked in red

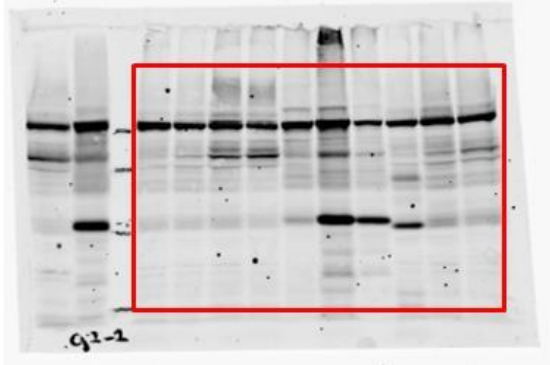

Panel C

Section used in Figure 5D  
marked in red

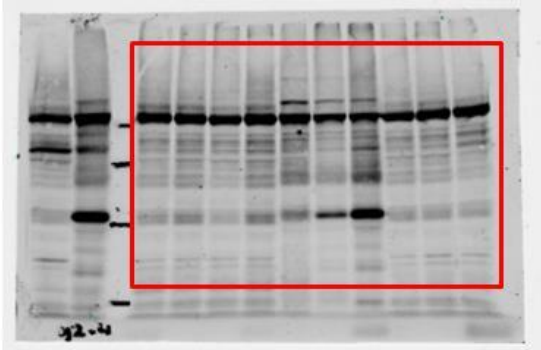

Panel D

**Figure 6**

Panels A, B

Section used in Figure 6A  
marked in red

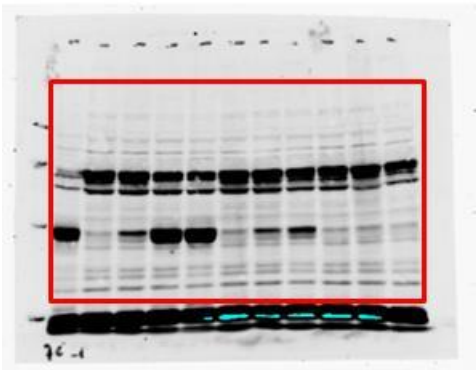

Section used in Figure 6B  
marked in red

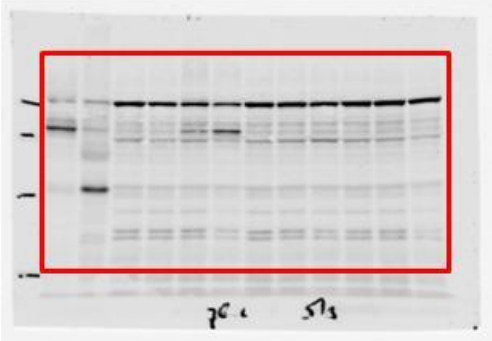

Panels C, D

Sections used in Figure 6C  
marked in red

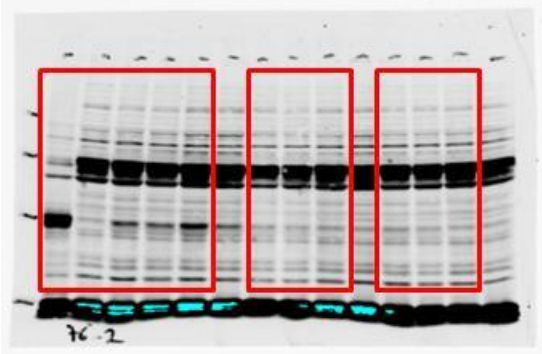

Sections used in Figure 6D  
marked in red

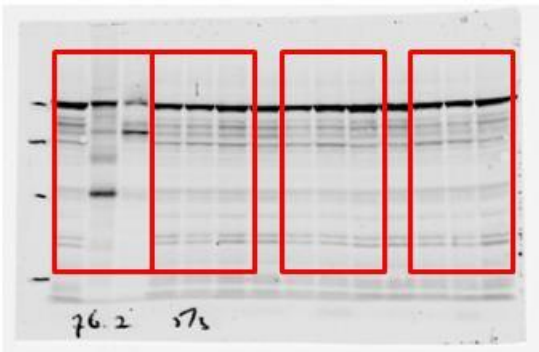

Panels E, F

Section used in Figure 6E  
marked in red

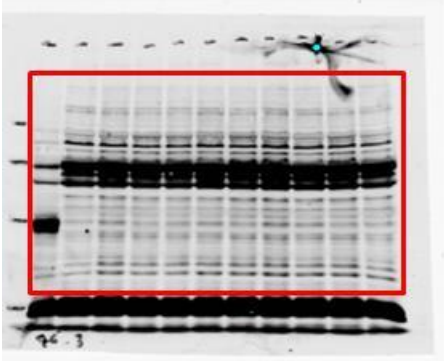

Section used in Figure 6F  
marked in red

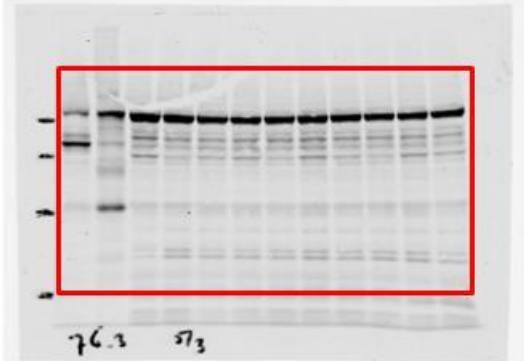

## Figure 8

Panel A

Section used in Figure 8A  
marked in red

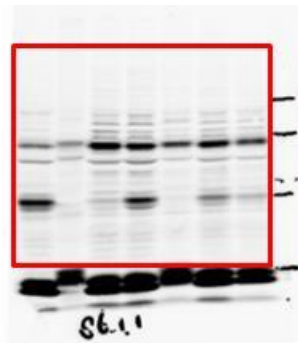

Panel B

Section used in Figure 8B  
marked in red

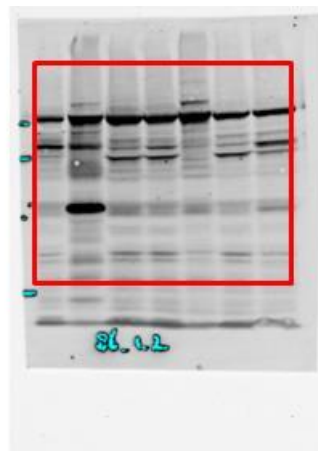

Panel C

Section used in Figure 8C  
marked in red

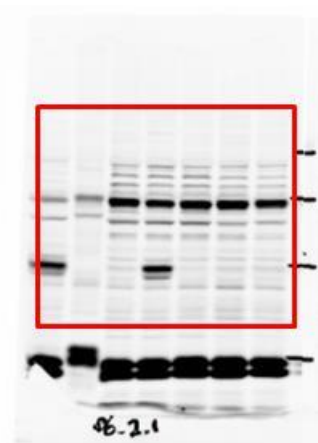

Panel D

Section used in Figure 8D  
marked in red

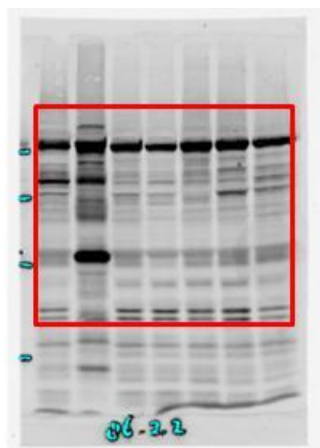

Supplementary Figure 1

Section used in  
Supplementary Figure 1A  
marked in red

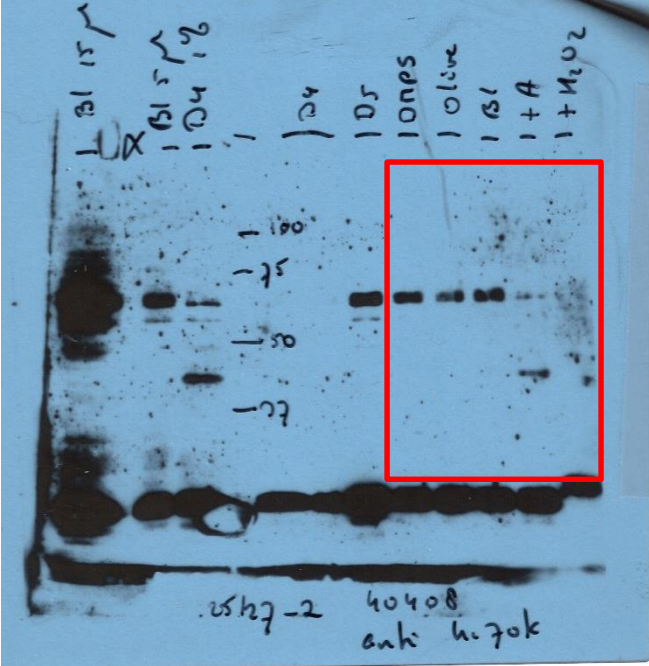

Section used in  
Supplementary Figure 1B  
marked in red

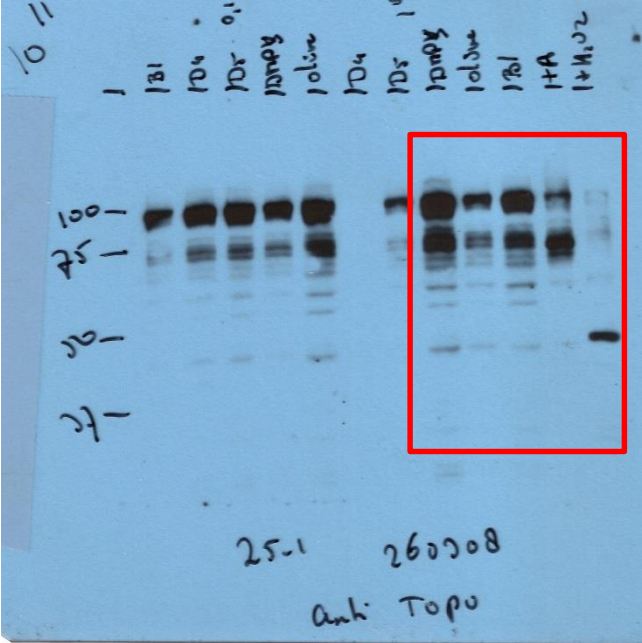

Supplement: 41598_2020_66666_MOESM1_ESM.pdf [file 41598_2020_66666_MOESM1_ESM.pdf]
